# Supplementary material for: A Chemical Recipe for Generation of Clinical-Grade Striatal Neurons from hESCs
Source: PubMed Central journal article supplement — Stem Cell Reports. 2018 Aug 30;11(3):635–50. doi: 10.1016/j.stemcr.2018.08.005 (PMC6135866; doi:10.1016/j.stemcr.2018.08.005), 2018-08-30
Supplement: mmc1.pdf [file mmc1.pdf]

**Stem Cell Reports, Volume 11**

**Supplemental Information**

**A Chemical Recipe for Generation of Clinical-Grade Striatal Neurons  
from hESCs**

**Menghua Wu, Da Zhang, Chunying Bi, Tingwei Mi, Wenliang Zhu, Longkuo Xia, Zhaoqian  
Teng, Baoyang Hu, and Yihui Wu**

SUPPLEMENTAL INFORMATION

SUPPLEMENTAL FIGURES AND TABLES

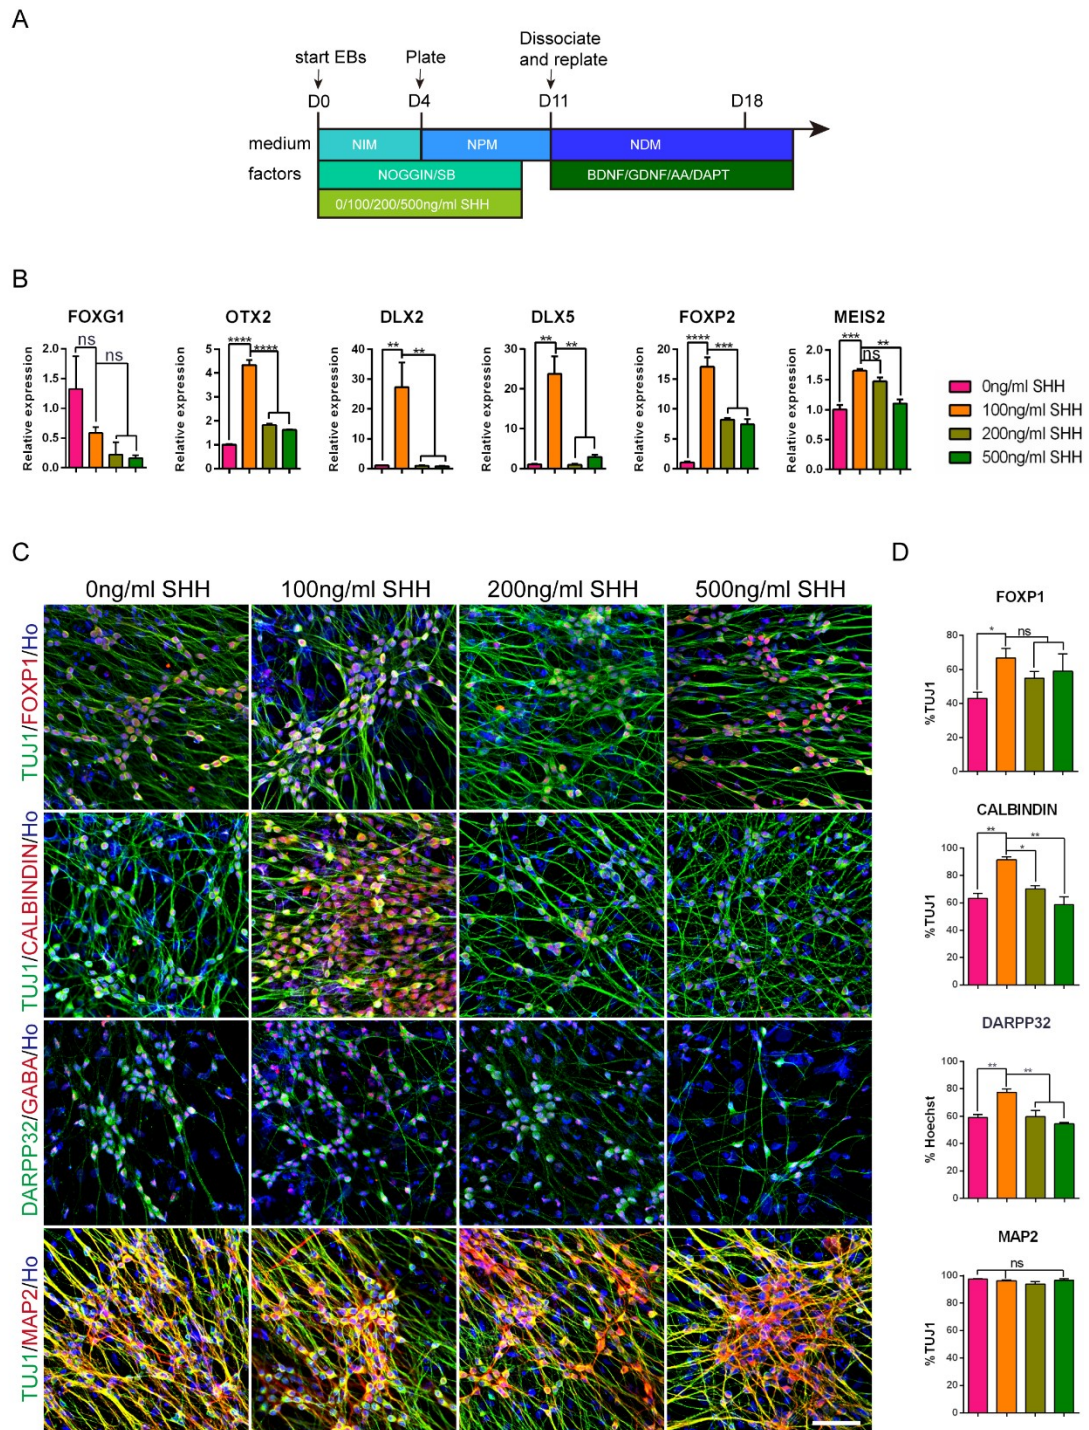

**Figure S1. Robust generation of striatal MSNs by optimizing SHH pathway activity.**

(A) Overview of differentiation protocol for hESCs. SB represents SB431542; AA represents ascorbic acid.

(B) Gene expression changes of cultures treated with different concentrations of SHH as measured by qRT-PCR on differentiation 14 day. Data are presented as the mean of three independent experiments;

Error bars represent SEM. ns, no significant, \*\*P < 0.01, \*\*\*P < 0.001, \*\*\*\*P < 0.0001. One-way ANOVA, followed by Tukey's multiple comparisons tests.

(C) Expression of MSN markers after treatment with different concentrations of SHH, imaged by confocal microscopy. Ho represents Hoechst33258. Scale bars, 50  $\mu$ m.

(D) Efficiencies of MSN differentiation, determined by counting FOXP1, CALBINDIN, DARPP32 and MAP2-positive cells. Efficiencies are presented as the percentage of positive cells plus or minus the SEM of all fields counted. ns, no significant, \*P < 0.05, \*\*P < 0.01. One-way ANOVA, followed by Tukey's multiple comparisons tests.

See also Figure 1.

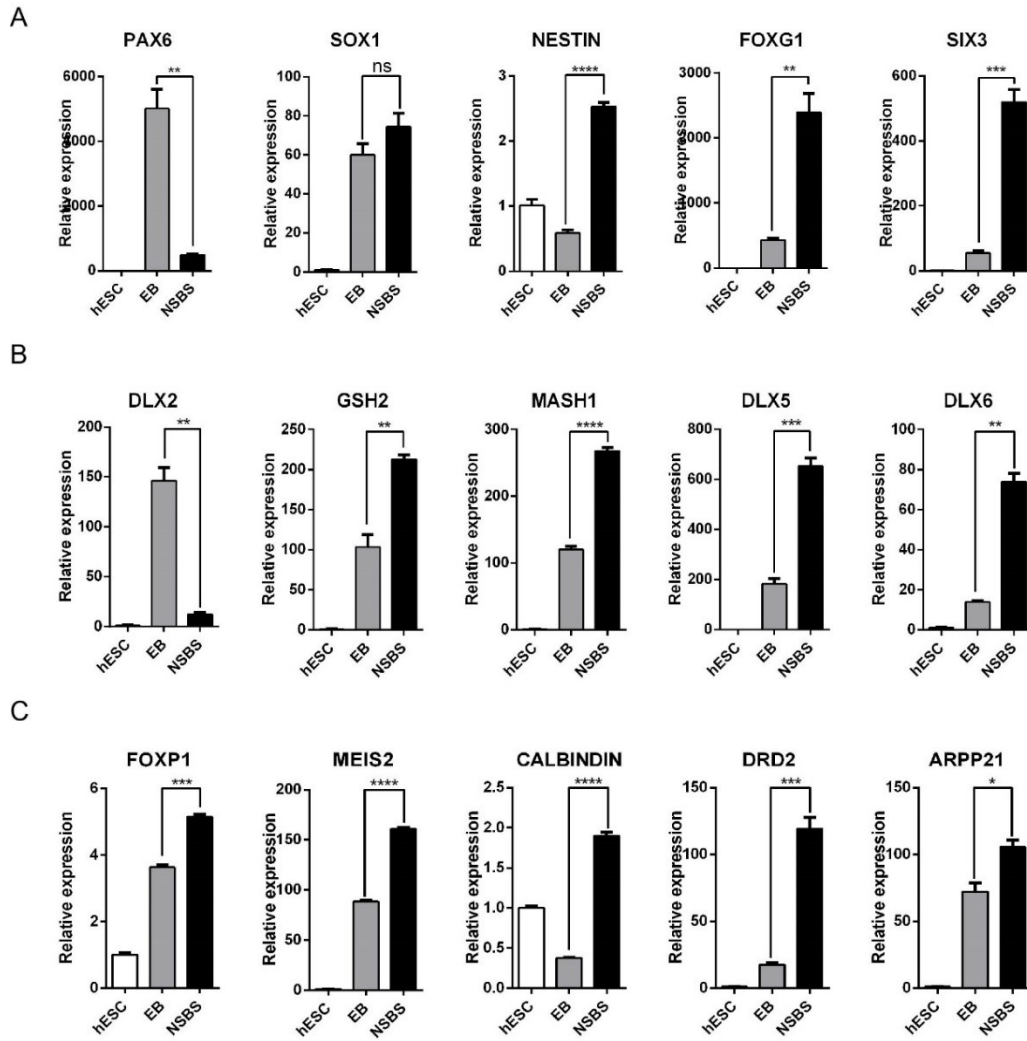

**Figure S2. NSBS differentiation protocol is more efficient compared to EB protocol.**

(A-C) QPCR analysis of gene expression at different differentiation stages of EB and NSBS protocol. Data are presented as the mean of three independent experiments; error bars represent SEM. ns, no significant, \* $P < 0.05$ , \*\* $P < 0.01$ , \*\*\* $P < 0.001$ , \*\*\*\* $P < 0.0001$ . Student's *t*-test.

See also Figure 1.

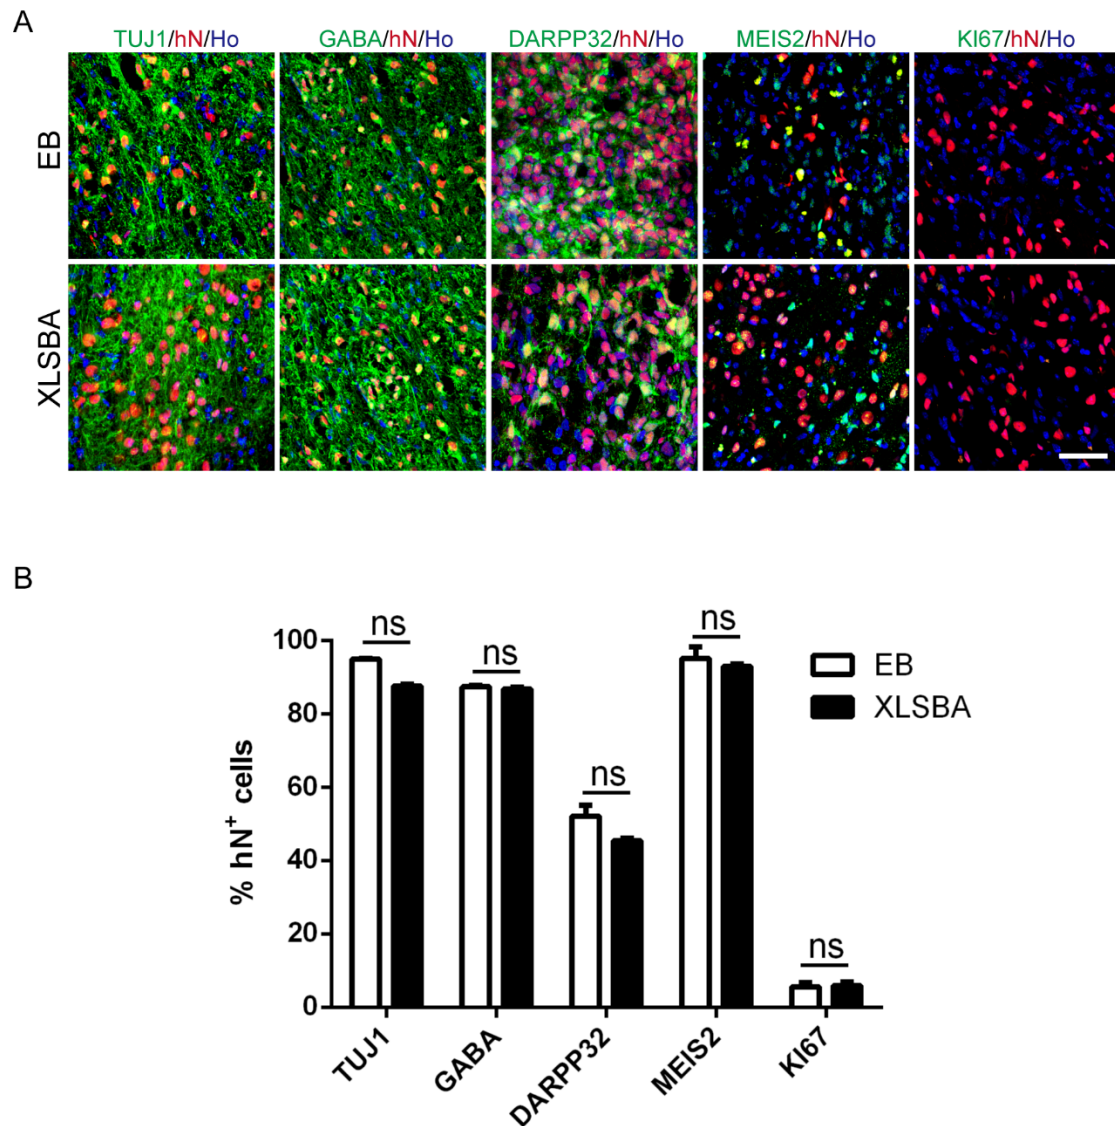

**Figure S3. Comparisons of the survival and differentiation of grafted cells between EB and XLSBA group.**

(A) Immunostaining images of 16-week-old grafts for TUJ1, GABA, DARPP32, MEIS2 and KI67. Grafted human cells were revealed by human nuclei (hN) staining. Scale bars, 50  $\mu$ m. (B) Quantification for the proportion of indicated markers in (A). ns, no significant, Student's t-test. Data are presented as mean  $\pm$ SEM.

See also Figure 6.



A Control group:

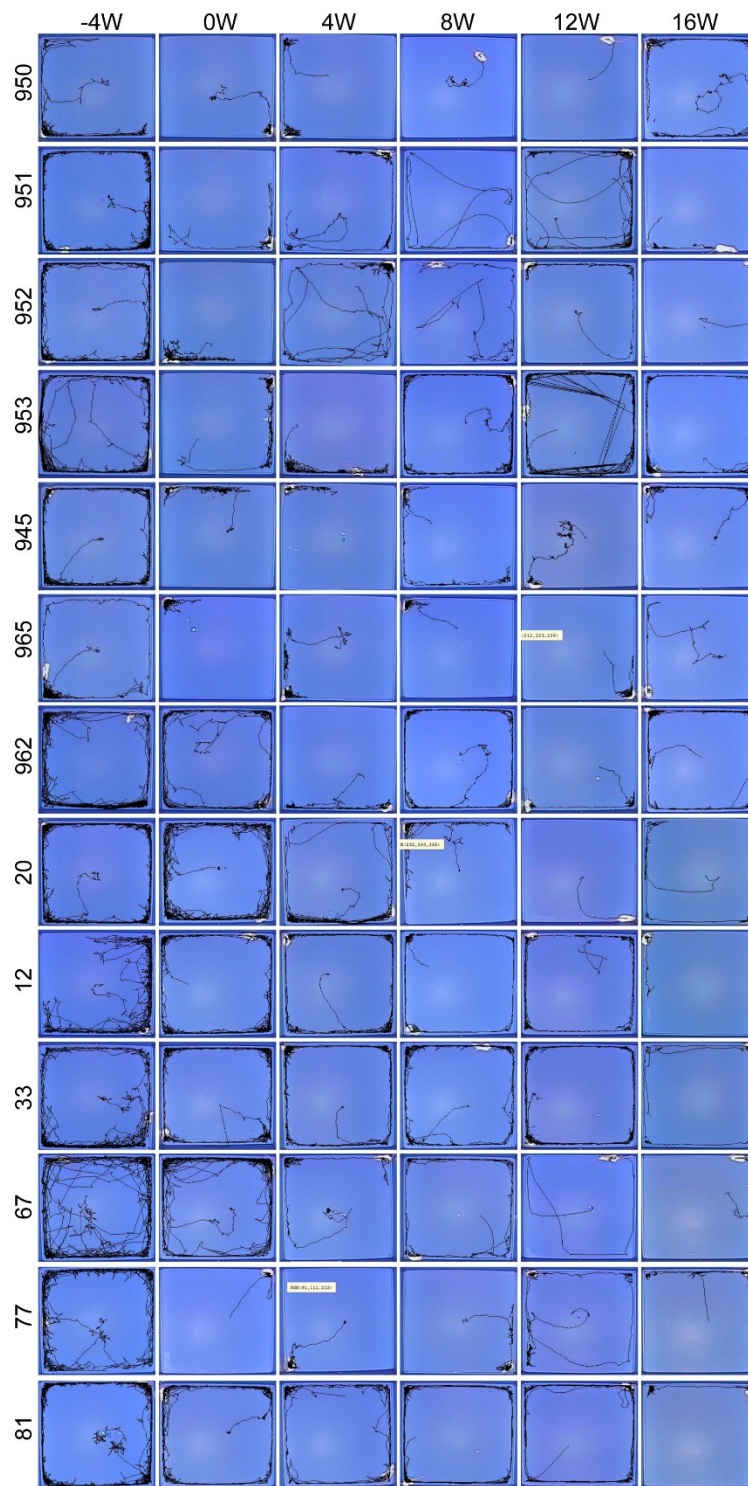

B Cell group:

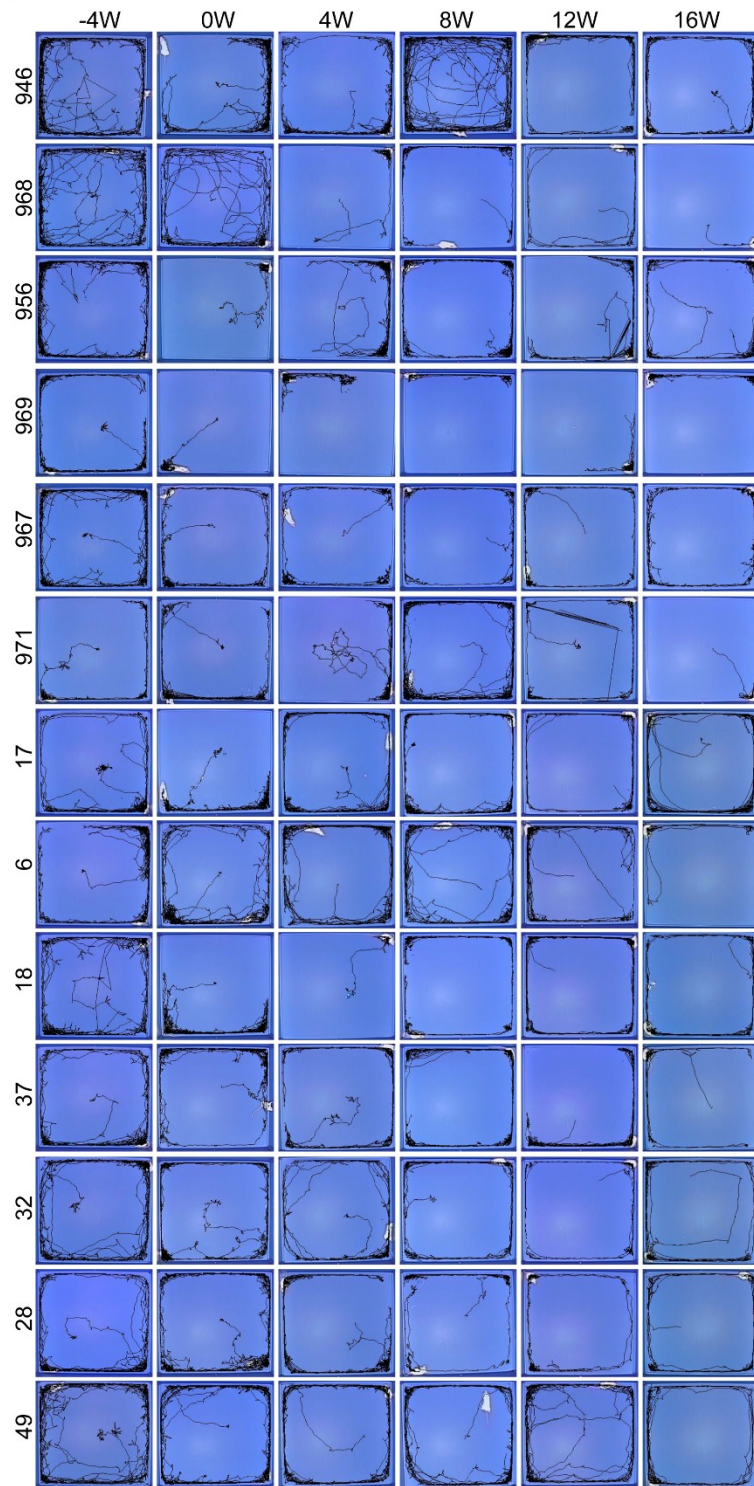

**Figure S4. Functional recovery is evaluated by behavior tests after transplantation of hESC-derived LGE progenitors.**

(A) Traces of open field test in animals receiving sham operation. (B) Traces of open field test in animals receiving cell grafts. The numbers represent the identifier of each mouse.

See also Figure 6.

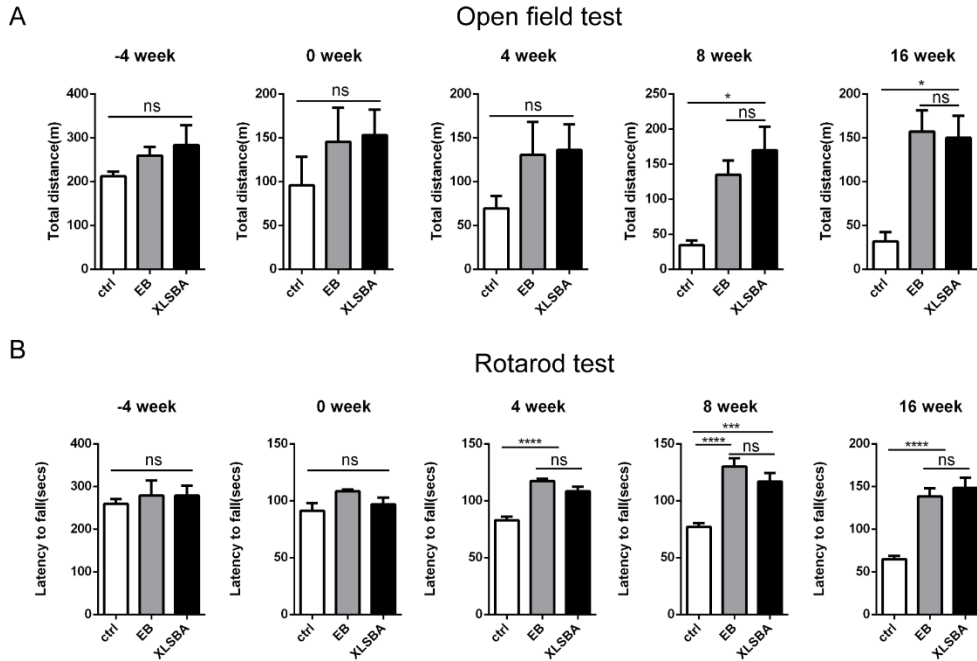

**Figure S5. Comparisons of behavior performances between EB and XLSBA group.**

(A) Open field tests indicated increased total distance in mice grafted with cells generated by EB and XLSBA protocol but not control group after 8 week and 16 week post-transplantation. The total distance showed no change in mice between EB and XLSBA group. (B) The rotarod test showed increased latency in mice transplanted with cells generated by EB and XLSBA protocol but not control group starting from 4 week post-transplantation. The performance showed no difference between EB and XLSBA group. The tests were analyzed by one-way ANOVA (ns, no significant, \* $p < 0.05$ , \*\*\* $p < 0.001$ , \*\*\*\* $p < 0.0001$ , control group:  $n = 13$ , EB group:  $n = 13$ , XLSBA group:  $n = 13$ ). Data are presented as mean  $\pm$  SEM. See also Figure 6.



**Table S1.** Electrophysiological properties of neurons during differentiation.

| Group                | D20 (n=39)      | D22 (n=54)      | D24 (n=16)      | Co-culture (n=20) |
|----------------------|-----------------|-----------------|-----------------|-------------------|
| RMP (mV)             | -40.5179±2.1788 | -42.5796±1.8247 | -39.2188±3.8054 | -54.36±2.6579     |
| R <sub>in</sub> (GΩ) | 4.9938±0.4654   | 4.0574±0.4345   | 3.3242±0.4852   | 2.0702±0.568      |
| C <sub>m</sub> (pF)  | 20.8231±0.7453  | 25.0344±0.7008  | 23.7881±1.9527  | 25.467±1.3996     |

RMP: Resting Membrane Potential; R<sub>in</sub>: Input Resistance; C<sub>m</sub>: Capacitance.

**Tables S2.** Primary antibodies used for immunofluorescence staining.

| Antibody       | Species | Catalog Number | Company          | Dilution |
|----------------|---------|----------------|------------------|----------|
| CALBINDIN      | rabbit  | AB1778         | Millipore        | 1/1000   |
| ChAT           | goat    | AB144P         | Millipore        | 1/500    |
| CTIP2          | rat     | ab18465        | Abcam            | 1/500    |
| DARPP32        | rabbit  | ab40801        | Abcam            | 1/500    |
| DLX2           | rabbit  | ab5726         | Millipore        | 1/500    |
| Met-Enkephalin | rabbit  | ab5026         | Millipore        | 1/1000   |
| FOXP1          | rabbit  | ab18259        | Abcam            | 1/500    |
| FOXP1          | rabbit  | ab16645        | Abcam            | 1/500    |
| GABA           | rabbit  | A2052          | Sigma            | 1/500    |
| GABA           | mouse   | A0310          | Sigma            | 1/200    |
| GFAP           | rabbit  | 180063         | Invitrogen       | 1/200    |
| GSH2           | rabbit  | ABN162         | Millipore        | 1/500    |
| hNuclei        | mouse   | MAB1281        | Millipore        | 1/200    |
| 5-HT           | rabbit  | 20080          | Immunostar       | 1/500    |
| IBA1           | rabbit  | 019-19741      | Wako             | 1/200    |
| KI67           | rabbit  | AB9260         | Millipore        | 1/500    |
| MAP2           | mouse   | ab11267        | Abcam            | 1/1000   |
| NESTIN         | mouse   | MAB5326        | Millipore        | 1/500    |
| NESTIN         | rabbit  | ABD69          | Millipore        | 1/1000   |
| NEUN           | mouse   | MAB377         | Millipore        | 1/500    |
| OLIG2          | goat    | SC-19969       | Santa Cruz       | 1/200    |
| PAX6           | rabbit  | ab5790         | Abcam            | 1/500    |
| PAX6           | mouse   | MAB5552        | Millipore        | 1/500    |
| PSD95          | goat    | ab12093        | Abcam            | 1/1000   |
| PV             | mouse   | MAB1572        | Millipore        | 1/2000   |
| SOX1           | goat    | AF3369         | R&D              | 1/2000   |
| SOMATOSTATIN   | rabbit  | ab5494         | Millipore        | 1/1000   |
| Substance P    | rabbit  | AB1566         | Millipore        | 1/1000   |
| Synapsin1      | mouse   | 106011         | Synaptic systems | 1/500    |
| Synaptotagmin1 | mouse   | 105011         | Synaptic systems | 1/500    |
| TH             | rabbit  | AB152          | AB152            | 1/200    |
| TUJ1           | mouse   | T8660          | Sigma            | 1/1000   |
| TUJ1           | rabbit  | T2200          | Sigma            | 1/1000   |
| VGLUT1         | rabbit  | 135302         | Synaptic systems | 1/2000   |

**Table S3.** Sequence of qRT-PCR primers used in this study.

| Target gene | Primer forward         | Primer reverse           |
|-------------|------------------------|--------------------------|
| ASCL1       | GTCTGTGCGCCACCATCTC    | CCCTCCCAACGCCACTGAC      |
| ARPP21      | GTGCAAAGCGTGATGGTTTCC  | CCTTGACCTGCCTGGTTAGG     |
| CALBINDIN1  | ATCAGGACGGCAATGGATAC   | TAAGAGCAAGATCCGTTCCG     |
| CTIP2       | ATCCTCAGCCCCTTTTGT     | GCCGTTGTTCTGAATTGTT      |
| DARPP32     | CCTGAAGGTCATCAGGCAGT   | GGTCTTCCACTTGGTCCTCA     |
| DCX         | CAAGTCTAAGCAGTCTCCATC  | ATAGCCCTGTTGGACACTTG     |
| DLX2        | ACCAGACCTCGGGATCCGCC   | CTGCGGGGTCTGAGTGGGGT     |
| DLX5        | TTCAGAAGACTCAGTACCTCGC | GAGTTACACGCCATTGGGTC     |
| DLX6        | TACCTCCAGTCCTACCACAAC  | AATAAATGGTCCGAGGCTCCG    |
| DRD2        | CTGAGGGCTCCACTAAAGGAG  | CATTCTTCTCTGGTTTGGCG     |
| EAR         | GAGGCTGAGGCAGGAGAATCG  | GTCGCCCAGGCTGGAGTG       |
| EMX2        | GGGATCCGTCCACCTTCTAC   | CTCAAAGGCGTGTTCAGCC      |
| EN1         | CGTGGCTTACTCCCCATTTA   | TCTCGCTGTCTCTCCCTCTC     |
| FOXP1       | TGTTGACTCAGAACTCGCTGG  | CTGCTCTGCGAAGTCATTGAC    |
| FOXP2       | AATGTGGGAGCCATACGAAG   | GCCTGCCTTATGAGAGTTGC     |
| GAPDH       | GAAGGTGAAGGTCGGAGTC    | GAAGATGGTGATGGGATTC      |
| GBX2        | CTCGCTGCTCGCCTTCTC     | GCCAGTCAGTCAGATTGTCATCCG |
| GSH2        | TATGTCGACTCGCTCATCATC  | CAAGCGGGATGAAGAAATCC     |
| HOXA4       | ACGCTCTGTTTGTCTGAGCGCC | AGAGGCCGAGGCCGAATTGGA    |
| LMX1A       | CGCATCGTTTCTTCTCCTCT   | CAGACAGACTTGGGGCTCAC     |
| MAP2        | AAAGCTGATGAGGGCAAGAA   | GGCCCTGAATAAATTCCAT      |
| MEIS2       | GATGAAAGAGACGGCAGCTCC  | GGGTTGAGGTTGCATCATCG     |
| NESTIN      | GGAAGAGAACCTGGGAAAGG   | CTTGGTCCTTCTCCACCGTA     |
| NKX2.1      | ACGGGTTTCAGACTCAGTTC   | ATCGACATGATTTCGGCGTCGG   |
| NOLZ1       | ACATTTTGCACCCCGAGTAC   | GGAGTACGGCTTGAAACTCG     |
| OTX2        | TCAACTTGCCCGAGTCGAGG   | CAATGGTCGGGACTGAGGTG     |
| PAX6        | TCCATCAGTTCCAACGGAGAA  | GTGGAATTGGTTGGTAGACAC    |
| SIX3        | CCGGAAGAGTTGTCCATGTT   | CGACTCGTGTGTTGTTGATGG    |
| SOX1        | ATGCACCCTACGACATGG     | CTCATGTAGCCCTGCGAGTTG    |
| SOX2        | CAAGATGCACAACCTCGGAGA  | CGGGCCGGTATTATAATC       |
| TBR2        | CACCGCCACCAAAGTGAAT    | CGAACACATTGTAGTGGGCAG    |
| TUJ1        | AACGAGGCCTCTTCTCACA    | GGCCTGAAGAGATGTCCAAA     |

## SUPPLEMENTAL EXPERIMENTAL PROCEDURES

### Generation of striatal MSNs from hESCs with chemical cocktails

Differentiation media were described as previously (Kirkeby et al., 2012a; Kirkeby et al., 2012b): neural induction medium (NIM) consisted of DMEM/F12: Neurobasal (1:1), N2 supplement (1:100), B27 supplement (1:50) and GlutaMAX (1:100); neural proliferation medium (NPM) consisted of DMEM/F12: Neurobasal (1:1), N2 supplement (1:200), B27 supplement (1:100) and GlutaMAX (1:100); and neural differentiation medium (NDM) consisted of Neurobasal, B27 supplement (1:50) and GlutaMAX (1:100). For differentiation, hESCs were detached with dispase to form EBs in NIM. Then the EBs were plated in NPM onto plastic plate coated with Matrigel on day 4. From D0 to D9, SB431542 and LDN-193189, Dorsomorphin or NOGGIN was present in the medium. Patterning factors SHH-C24II, SAG or Purmorphamine were also in present in the medium from d0-d9 or d0-d5. On D11 of differentiation, the cells were dissociated to small clusters with Accutase and replated onto the matrigel-coated plates in NDM. Brain-derived neurotrophic factor (BDNF), glial cell line-derived neurotrophic factor (GDNF), ascorbic acid (AA) and DAPT were added for terminal differentiation. For clinical-grade hESC differentiation, all Clinical Therapy Systems (CTS) reagents were purchased from Life Technologies, and cells were replated on the PO/FN/lam-coated plates (Fibronectin, Gibco; Laminin, Sigma; Polyornithine, Sigma). Small-molecule compounds were as follows: XAV939 (0-4 $\mu$ M, Selleck), Dorsomorphin (100 nM, Selleck), LDN-193189 (100 nM, Selleck), SB431542 (10  $\mu$ M, Merck), SAG (0-100nM, Stemgent), Purmorphamine (0-1 $\mu$ M, Stemgent), ascorbic acid (200 mM, sigma) and DAPT (1 $\mu$ M, Tocris). Recombinant growth factors were as follows: SHH (C25II, 0–500 ng/ml), NOGGIN (200 ng/ml), BDNF (20 ng/ml) and GDNF (10 ng/ml), all from Peprotech.

1. **Day 0:** Check that the colonies appear pluripotent by visual criteria, and if needed, remove differentiated colonies from the culture. Aspirate E8 medium and add appropriate volume of dispase (2U/ml) to the cells (i.e., 1 ml for a 6-well) and incubate at 37°C for 8-12 min. When the edges of hPSC colonies begin to curl, aspirate off the dispase.
2. Add 2 ml of fresh E8 medium to each well. Gently pipette colonies off the dish. Collect hESC colonies into a 15-ml tube, and centrifuge at 600rpm for 2 min. Alternatively, let the hESC colonies settle down by letting the tube rest for 3–5 min. Aspirate off the supernatant without disturbing the cells.
3. To start differentiation, resuspend the cells in differentiation medium: NIM + LDN193189 (100nM) + SB431542 (10  $\mu$ M) +XAV939 (4  $\mu$ M) +SAG (100 nM). Plate cell suspension in non-treated cell culture dishes for EB formation.
4. **Day 1:** Transfer EB suspensions to a tube and centrifuge at 600rpm for 2 min. Alternatively, let the EBs settle down by letting the tube rest for 3–5 min. Aspirate the medium and re-suspend the EBs in new NIM medium + LDN193189 (100nM) + SB431542 (10  $\mu$ M) +XAV939(4  $\mu$ M)+SAG (100 nM). Transfer EBs into the same dishes.
5. **Day 2-3:** Change the medium as step 4 every day.
6. **Day 4:** Transfer EB suspensions to a tube and spin down gently at 600rpm for 2 min. Resuspend EBs in NPM medium+ LDN193189 (100 nM) + SB431542 (10  $\mu$ M) +XAV939(4  $\mu$ M)+SAG (100 nM). Replate the EBs into wells coated with PO/lam/FN or Matrigel.
7. **Day 5:** Change the medium with NPM medium+ LDN193189 (100 nM) + SB431542 (10  $\mu$ M).
8. **Day 7:** Change the medium with NPM medium+ LDN193189 (100 nM) + SB431542 (10  $\mu$ M).

9. **Day 9:** Change the medium with NPM medium without any small molecules.
10. **Day 11-16:** Change the medium with NDM medium+BDNF (20 ng/ml) +GDNF (10 ng/ml) +AA (0.2 mM) +DAPT (1 $\mu$ M). Or passage cells: wash cells with PBS, and add Accutase to the wells. Incubate the cells at 37°C for 3-5 min. Dissociate cells with a pipette and spin down at 600rpm for 3 min (before spinning, take an aliquot out for cell counting). Resuspend cells in NDM medium + BDNF (20 ng/ml) +GDNF (10 ng/ml) +AA (0.2 mM) +DAPT (1 $\mu$ M). Then replat the cells into wells coated with PO/lam/FN or Matrigel in a density of 2.5–5 $\times$ 10<sup>6</sup> cells for one well of a 6-well plate.
11. **Day 17-24:** Change the medium with NDM medium+BDNF (20 ng/ml) +GDNF (10 ng/ml) +AA (0.2 mM) +DAPT (1 $\mu$ M) every other day.

**Reagent setup:**

Neural induction medium (NIM):

| H9/H1 hESC      | Q-CTS-hESC-2             | Volume |
|-----------------|--------------------------|--------|
| DMEM/F12        | CTS™ KnockOut™ DMEM/F-12 | 240 ml |
| Neurobasal      | CTS™ Neurobasal® Medium  | 240 ml |
| N2 (100X)       | CTS™ N-2 Supplement      | 5 ml   |
| B27 (50X)       | CTS™ B-27® Supplement    | 10 ml  |
| GlutaMAX (100X) | CTS™ GlutaMAX™-I         | 5 ml   |
| Total           |                          | 500 ml |

Neural proliferation medium (NPM):

| H9/H1 hESC      | Q-CTS-hESC-2             | Volume    |
|-----------------|--------------------------|-----------|
| DMEM/F12        | CTS™ KnockOut™ DMEM/F-12 | 243.75 ml |
| Neurobasal      | CTS™ Neurobasal® Medium  | 243.75 ml |
| N2 (100X)       | CTS™ N-2 Supplement      | 2.5 ml    |
| B27 (50X)       | CTS™ B-27® Supplement    | 5 ml      |
| GlutaMAX (100X) | CTS™ GlutaMAX™-I         | 5 ml      |
| Total           |                          | 500 ml    |

Neural differentiation medium (NDM):

| H9/H1 hESC      | Q-CTS-hESC-2            | Volume |
|-----------------|-------------------------|--------|
| Neurobasal      | CTS™ Neurobasal® Medium | 485 ml |
| B27 (50X)       | CTS™ B-27® Supplement   | 10 ml  |
| GlutaMAX (100X) | CTS™ GlutaMAX™-I        | 5 ml   |
| Total           |                         | 500 ml |

**Electrophysiological assessment.** Whole-cell current and clamp recordings were performed at 22 °C in artificial cerebral spinal fluid, bubbled with 95% O<sub>2</sub> and 5% CO<sub>2</sub>. The extracellular fluid consisted of (in mM) 124 NaCl, 3.3 KCl, 2.4 MgSO<sub>4</sub>, 1.2 KH<sub>2</sub>PO<sub>4</sub>, 26 NaHCO<sub>3</sub>, 2.5 CaCl<sub>2</sub> and 10 Glucose (at pH 7.4). TTX (100 nM), bicuculline (30  $\mu$ M), or GABA (10  $\mu$ M) were used in the bath solution. Borosilicate glass electrodes (resistance 6–10 M $\Omega$ ) were filled with an intracellular solution containing 135 mM potassium gluconate, 7 mM NaCl, 10 mM HEPES, 2 mM MgATP, 0.3 mM Na<sub>2</sub>GTP and 2 mM MgCl<sub>2</sub>,



adjusted to pH 7.4 with KOH. Cell visualization and patch pipette micromanipulation were performed by video-microscopy, employing a 40× water-immersion objective mounted on an upright microscope equipped with infrared differential interference contrast (Nikon, Eclipse fn1, Japan). Intracellular membrane electrical potentials were recorded in current-clamp mode, using a Multi-clamp 700B amplifier (Molecular Devices, Palo Alto, CA, USA). For voltage clamp recordings, cells were held at -70 mV. (-)-Bicuculline methochloride and tetrodotoxin (TTX) were purchased from Shanghai yuanye Bio-Technology Co., Ltd; GABA were purchased from Solarbio (Beijing, China). All other compounds were obtained from Sigma (St. Louis, MO). Data were digitized at 10 kHz with a 2 kHz low-pass filter. Data processing and analysis were performed using Clampfit 10.6 (Axon Instruments).

**Neural transplantation and quinolinic acid striatal lesions.** All animal experiments were carried out in accordance with the instructions for the Care and Use of Animals in Research published by the Institute of Zoology of the Chinese Academy of Sciences. Transplantation into the neonatal NOD-SCID mice was conducted as described previously (Danjo et al., 2011). In brief, transplantation was performed by anesthetizing day 1 postnatal NOD-SCID mice on ice for 3 min, and injecting the cell suspension ( $\sim 5 \times 10^4$  cells per  $\mu\text{l}$ ) into the striatum (coordinated 1 mm anterior, 1 mm lateral, and 2.5 mm deep from the bregma). The establishment of quinolinic acid (QA)-lesioned mouse model of HD and cell transplantation were performed as previously described (Ma et al., 2012). To establish unilateral lesion of mouse model of Hunting's disease, adult male SCID mice (8 weeks of age) were anesthetized and received a stereotaxic injection of 1  $\mu\text{l}$  of 60nM quinolinic acid (QA, P63204; Sigma, in saline with 0.2 mg/ml ascorbic acid) into the right striatum on a coordinator (anterior-posterior [AP] = +0.7 mm, lateral [L] = +1.7 mm, vertical [V] = -3.5 mm). Differentiated LGE-like progenitors (12-14 days of differentiation from hESCs) were dissociated with Accutase and prepared at approximately  $5 \times 10^4$  cells/ $\mu\text{l}$  in PBS containing B27, 0.2 mM AA, 20 ng/ml BDNF, and 10 ng/ml GDNF. Cell suspension (2  $\mu\text{l}$ ) was injected into the lesioned striatum (AP = +0.8 mm, L = +1.8 mm, V = -3.5 mm) of anesthetized animals 2 weeks after QA lesion with a glass pipette (0.3–0.5 mm in diameter) over a period of 5 min. The QA-lesioned animals receiving the same surgery and injection of 2  $\mu\text{l}$  of PBS solution (without cells) served as controls. For analysis, mice were perfused transcardially with 4% paraformaldehyde, and 20  $\mu\text{m}$ -thick brain sections were taken for immunostaining.
